# Supplementary material
Source: Springer Nature journal article supplement (https://www.springermedizin.de/resource/supplementary/12882_2011_260_MOESM4_ESM.pdf/9453610)

Mean eGFR at 1st Measurement by Age (based on EPI) who Entered the System after 2003

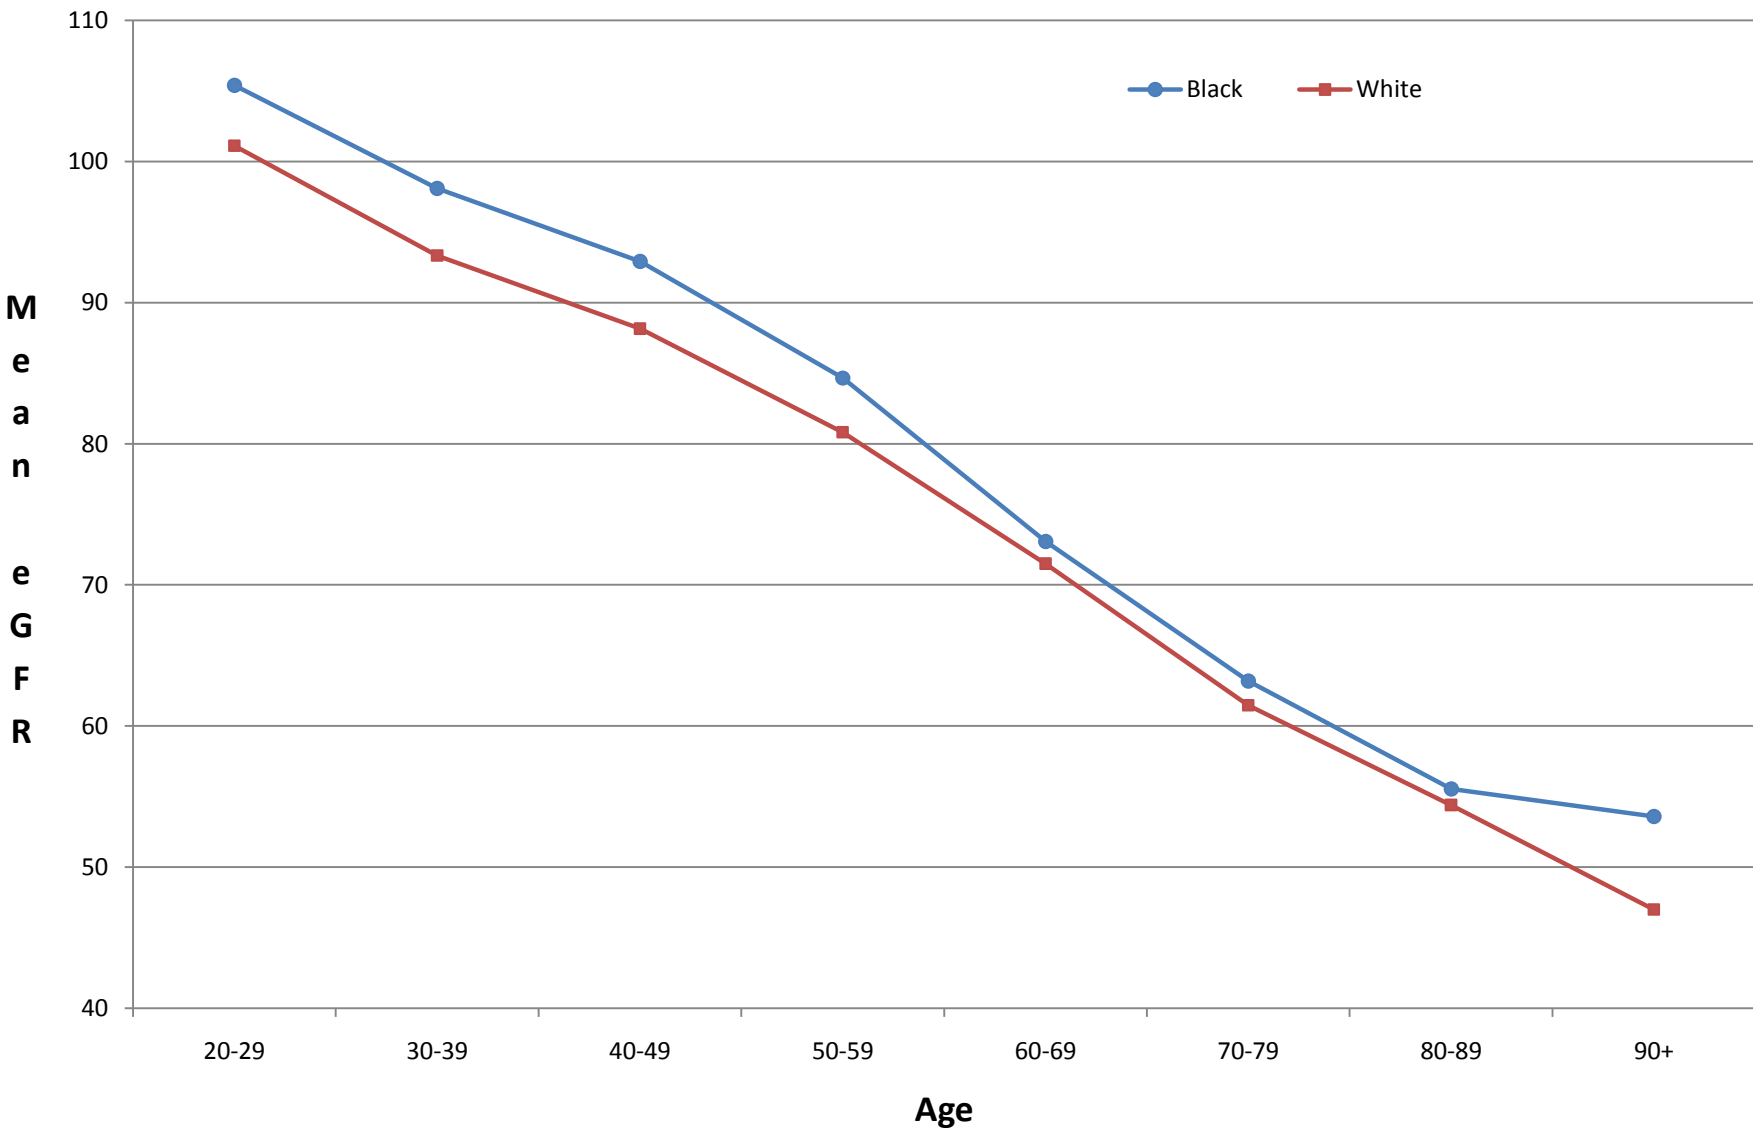

Supplement: MOESM4 [file 9453610]
